# Production of high cellulase yields from polypore fungi in solid-state fermentation using green tea waste

Nguyen KA<sup>1,2</sup>, Penkhrue W<sup>3</sup> and Lumyong S<sup>1,3,4\*</sup>

<sup>1</sup>Department of Biology, Faculty of Science, Chiang Mai University, Chiang Mai 50200, Thailand

<sup>2</sup>Master's Degree Program in Applied Microbiology, Faculty of Science, Chiang Mai University

<sup>3</sup>Center of Excellent in Microbial Diversity and Sustainable Utilization, Faculty of Science, Chiang Mai University, Chiang Mai 50200, Thailand

<sup>4</sup>Academy of Science, the Royal Society of Thailand, Dusit, Bangkok 10300, Thailand

Nguyen KA, Penkhrue W, Lumyong S 2019 – Production of high cellulase yields from polypore fungi in solid-state fermentation using green tea waste. *Mycosphere* X(X), X–X, Doi 10.5943/mycosphere/X/X/X

## Abstract

Polypores are diverse macrofungi that have been extensively studied for their enzyme production capabilities. Presently, these enzymes are being used for many industrial purposes. However, the high-cost associated with their production is the main barrier to their broader application. This work aimed to study the optimal medium and conditions by using solid state fermentation. Seven polypore strains were used for cellulase activity screening. The fermentation experiments were carried out in 250 mL Erlenmeyer flasks with green tea waste as a substrate. Notably, *Microporus* sp. KA038 showed the best level of activity of 81.8 IU/gds. Various parameters such as temperature on growth, moisture content, nitrogen source, initial pH value, inoculum size and incubation time were considered to determine the optimal conditions for cellulase production. The optimal medium consisted of green tea leaves as a carbon source, beef extract as an organic nitrogen source, and  $\text{NH}_4\text{H}_2\text{PO}_4$  as an inorganic nitrogen source, while pH 7.0 and an incubation temperature of 30°C for 4 days resulted in a high enzyme yield with *Microporus* sp. KA038.

**Keywords** – Agricultural wastes – cellulolytic enzymes – white rot fungi

## Introduction

Lignocellulosic biomass is mainly formed of three polymers; cellulose, hemicellulose, lignin along with other components (Isikgor & Becer 2015). Despite the usefulness of these materials in many sectors of the economy, a great amount of the lignocellulosic biomass ends up being discarded and becomes a pollutant (Vintila et al. 2009). On the other hand, lignocellulose biomass is a source material that has been used for previous decades in the production of bioethanol, organic acids, enzymes and biodegradable plastics in the form of cheap carbohydrates (Rajeev & Amit 2016). Lignocellulosic material is promising as an energy source because of its potential for low cost fermentation (Sherief et al. 2010). Green tea is considered one of the most popular drinks in the world and the custom of drinking tea has spread quickly and widely throughout the world (Kondo et al. 2004). However, a substantial amount of tea waste is left after the tea extraction process. Thus, looking elsewhere to minimize or eliminate tea waste has been a difficult task in the tea processing industry (Yang et al. 2015). Hence, at present the elimination of tea waste in the environment in an economically sound and efficient manner has become of significant interest among scientists.

In contrast with submerged fermentation (SmF), solid state fermentation (SSF) is a procedure wherein the substrate is fermented and barely appears in water. The low moisture content in the fermentation of microorganisms is limited primarily to yeasts, fungi and bacteria (Acharya et al. 2010). One of the most adaptive organisms to SSF is fungi because the fungal hyphae features are spread across the surface and easily penetrate into the inter particle spaces, thereby their colonization is typically more efficient than with other organisms in solid substrates (Sukumaran et al. 2005).

Polypores (basidiomycetes) are a group of wood decaying fungi that are diverse in ecological specificity and morphological characteristics. Most polypores are capable of breaking down lignocellulose, and consequently they play a mainstay role in nutrient recycling in forest ecosystems. Although some polypores can cause tree diseases such as *Onnia tomentosa*, *Phaeolus schweinitzii*, and *Phellinidium weirii* (Ginns 2017), others have medicinal properties (Jayachandran et al. 2017). Notably, the ability of polypores to produce enzymes has attracted the attention of scientists. In recent years, researchers have become interested in the screening and production of cellulase from polypores (Table 1), and the resulting research has shown positive results. Zecarias and co-workers (2016) screened ligninocellulolytic enzymes by the dye decolorization plate test, with 49 of 61 fungal strains showing decolorizing activity on Phenol red, Azure B and RBBR agar. The exoglucanase,  $\beta$ -glucosidase production were induced using the co-culture between *Trichoderma viride* and *Ganoderma lucidum* in SSF (Afzal et al. 2014). Cellulase is an enzyme that converts cellulose into simple sugars (glucose) (Chinedu et al. 2005). Many studies have reported that microorganisms and animals are able to hydrolyze  $\beta$ -1,4 linkages in cellulose (Henrissat 1991). The production rate of cellulase obtained from fungi is higher than from other microorganisms and this can be advantageous (Rana & Kaur 2012). Generally, complete cellulose hydrolysis is responded to by three main types of cellulase combinations including endoglucanases, exoglucanases, and  $\beta$ -glucosidase (Zhang & Lynd 2006). These enzymes are widely used in numerous application areas including the beverage, paper, textile industries, in agriculture and in detergents and animal feeds, as well as to serve as an important alternative source for energy generation. Some organic compounds are inducers for cellulase such as disaccharides, spent ammonium sulphite liquor (Han et al. 2017), and glycerol (Delabona et al. 2016). This research study aims to explore the isolation of polypore fungi and the production of cellulase enzyme.

**Table 1** Recent research studies on cellulase polypore fungi

| Polypores                    | Cellulase activity (IU/gds) | References          |
|------------------------------|-----------------------------|---------------------|
| <i>Coriolus versicolor</i>   | 78.75                       | Montoya et al. 2015 |
| <i>Melanoporia</i> sp.       | 7.50                        | Oliveira 2016       |
| <i>Pycnoporus coccineus</i>  | 14.812 $\pm$ 0.360          | Chuwech et al. 2016 |
| <i>Pycnoporus sanguineus</i> | 16.32 $\pm$ 2.65            | Onofre et al. 2015  |

## Materials & Methods

### Morphological observation

Basidiomata of re-supinate fungi were collected from the dead stumps on Suthep mountain in Chiang Mai, Thailand from December 2016 to July 2017. The basidiomata was isolated on PDA (Potato dextrose agar) and then sub-cultured every 7 days. The dried specimens were then deposited in the herbarium at the Center of Excellence in Microbial Diversity and Sustainable Utilization, Chiang Mai University.

Macro-morphological characteristics of the hymeneal surface were observed using fresh specimens.

Micro-morphological characterization of the selected strain was studied for species confirmation. The dried specimens were mounted with 5% KOH, stained with Melzer's solution and Congo-red under light microscopy on glass slides. Microscopic structures including spores and hyphae were measured for size using an ocular micrometre under a light microscope.

## DNA extraction, amplification & sequencing

Mycelia of each fungal sample were grown on PDA and harvested after 7 days of inoculation. The ITS region was amplified using the ITS1F/ ITS4, ITS5 primers as represented by White et al. (1990). Polymerase chain reaction products were purified using the NucleoSpin Gel and PCR Clean-up kit (Machery Nagel, Germany). Sequencing reactions were performed on an ABI PRISM 3100 Genetic Analyzer. Newly obtained sequences were compared with nucleotide entries in the National Center for Biotechnology Information GenBank (<http://www.ncbi.nlm.nih.gov/>) using the Blast search tool to confirm genus identity.

## Substrate and chemical preparation

Green tea waste was procured from Amazing Tea Chiang Mai Company, Chiang Mai, Thailand. It was ground using a blender. Citrate buffer was prepared by mixing sodium citrate and citric acid and the pH was adjusted to 5.0. All chemicals were of the highest reagent grade commercially available.

## Screening of cellulolytic ability

### *First screening: Plate screening using Carboxymethylcellulose (CMC) as carbon source:*

Fungal colonies (0.5 cm diameter) from one week old PDA plates were cut by pasture pipette and then inoculated into the middle of the CMC agar plates. The plates were then incubated at ambient temperatures ( $28 \pm 2$  °C) for three days. The plates were colored with 0.1% (w/v) Congo-red for 0.5-1 hour and discolored for 15- 20 min with 1 M NaCl solution. Finally, 1 M NaCl was discarded and the plates were washed with water at a pH of 2.0. The staining of the plates was analyzed by noticing the formation of clear or yellowish zones around the fungal colonies. Cellulolytic production ability was revealed by the size of a clear halo that was considered to be indicative of the zone of hydrolysis. This area was measured for enzymatic index (EI) calculation using the following formula (Beguin & Aubert 1994):

$$EI = \frac{\text{Diameter of hydrolysis zone}}{\text{Diameter of colony}}$$

### *Secondary screening: Screening of cellulolytic ability in liquid medium*

Cellulolytic ability of seven fungal strains was checked using the Dinitrosalicylic acid (DNS) method. Inoculum was prepared by inoculating 0.25 mL solution from seven-day-old fungal culture in PDB at 30°C with 180 rpm shaking. Supernatant was collected after 3 days of incubation and centrifuged at 10,000 rpm for 10 minutes at 4 °C. The reaction mixture containing 0.5 mL of the sample, 0.5 mL of sodium citrate buffer and 0.5 mL of 1%(w/v) CMC was then incubated at 37°C for 60 minutes. The reaction was ended by adding 1 mL of DNS reagent. The color was then increased by boiling for 5 minutes. The measurement of optical density was performed at 540 nm (Miller, 1959).

## Temperature on fungal growth

To investigate the effect of temperature on growth, the plates were incubated at different temperatures (25, 30, 37 and 45°C) in various incubators. The optimal temperature was recorded by the high diameter of the colonies every day over 7 days.

## Upscale screening on substrate by solid state fermentation

Cellulase production was studied in flasks containing 5 grams of green tea waste as a substrate containing 20 mL of distilled water with moisture content at 75%. The flasks were then sterilized at 121°C for 15 min. The strains were grown on PDA plates for 7 days and added to fermentation medium as an inoculum. The flasks were incubated at 30°C for 7 days. The fermented substrate of each flask was extracted using 50 mL of 50 mM citrate buffer (pH 5.0) and filtered through filter paper in an ice bucket. The crude extract was centrifuged at 8000 rpm for 5 min, the

supernatant was collected and used as a crude enzyme for cellulase assay using the DNS method (Miller, 1959).

### **Effect of moisture content on cellulase production**

The moisture content optimization was determined. Three flasks containing 5.0 g of dried green tea were adjusted to different moisture contents of 40, 50, 60, 70, 75, and 80% by adding water at 8, 10, 13, 15, 20 and 25 mL, respectively. The before and after values of dehydration and weight were calculated to determine the moisture content using the relevant equation (1). The flasks were then inoculated at 30°C for 7 days. The cellulase activity was measured using the DNS method.

$$\text{Moisture content (\%)} = \left( \frac{\text{Wet sample} - \text{Dry sample}}{\text{Wet sample}} \right) \times 100 \quad (1)$$

### **Effect of nitrogen source on cellulase production**

Organic nitrogen sources (peptone, beef extract, yeast extract, malt extract and tryptone) and inorganic nitrogen sources (Urea, NaNO<sub>3</sub>, (NH<sub>4</sub>)<sub>2</sub>SO<sub>4</sub>, NH<sub>4</sub>NO<sub>3</sub> and NH<sub>4</sub>H<sub>2</sub>PO<sub>4</sub>) at 0.1% (w/v) concentration were added into 125 mL Erlenmeyer flasks contained 5.0 g of dried green tea and adjusted to optimal moisture content (75%). Five discs of fungal strains were inoculated. The flasks were incubated for 7 days at 30°C and enzyme assay was then performed using the DNS method.

### **Effect of pH value on cellulase production**

The optimized pH value was performed by adjusting the pH to 4.0, 5.0, 6.0, 7.0, 8.0, 9.0, 10, 11 and 12 of the green tea waste containing fermentation media by using 0.1N HCl or 0.1N NaOH. After inoculation with 5 discs of 0.5 mm polypore colonies size, the flasks were incubated in an incubator at 30°C for 7 days.

### **Effect of inoculum size on cellulase production**

The inoculum size was optimized by preparing the inoculum on PDA plates containing polypores using a sterile pasture pipette of 0.5 mm in diameter. Green tea waste containing fermentation media was inoculated with 1, 3, 5, 7, 10, 12 and 15 disc(s) of the strain aseptically. After inoculation, the flasks were incubated at 30°C for 7 days. At regular intervals, the enzyme assay was performed.

### **Effect of incubation time on cellulase production**

To determine the effect of incubation time on cellulase enzyme production, the flasks were inoculated with the selected strain and incubated for different numbers of days (4, 10, 14, 18 and 24 days). The Optical Density (O.D) was taken at 540 nm using the DNS method.

## Results

### Collection and identification

In this study, the polypore samples were collected based on their distinct morphology. A total of seven strains were selected from dead logs (Fig. 1).

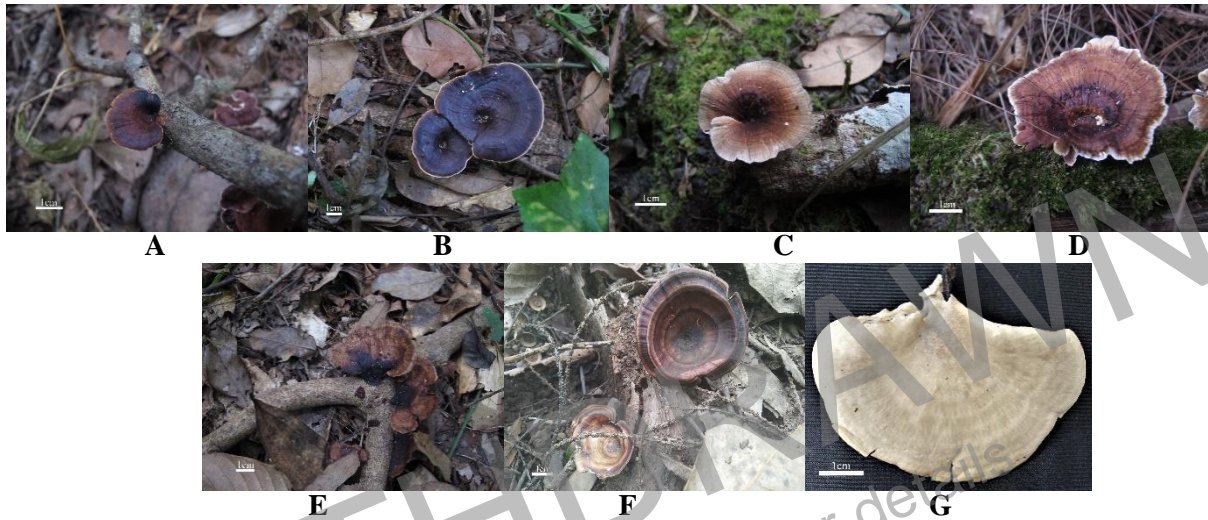

**Figure 1.** Fruiting body of **A.** KA007 (*Microporus* sp.), **B.** KA009 (*Microporus* sp.), **C.** KA012 (*Microporus* sp.), **D.** KA016 (*Microporus* sp.), **E.** KA018 (*Hexagonia* sp.), **F.** KA038 (*Microporus* sp.), **G.** KA053 (*Favolus* sp.) (Scale bars = 1 cm)

### Phylogenetic analyses

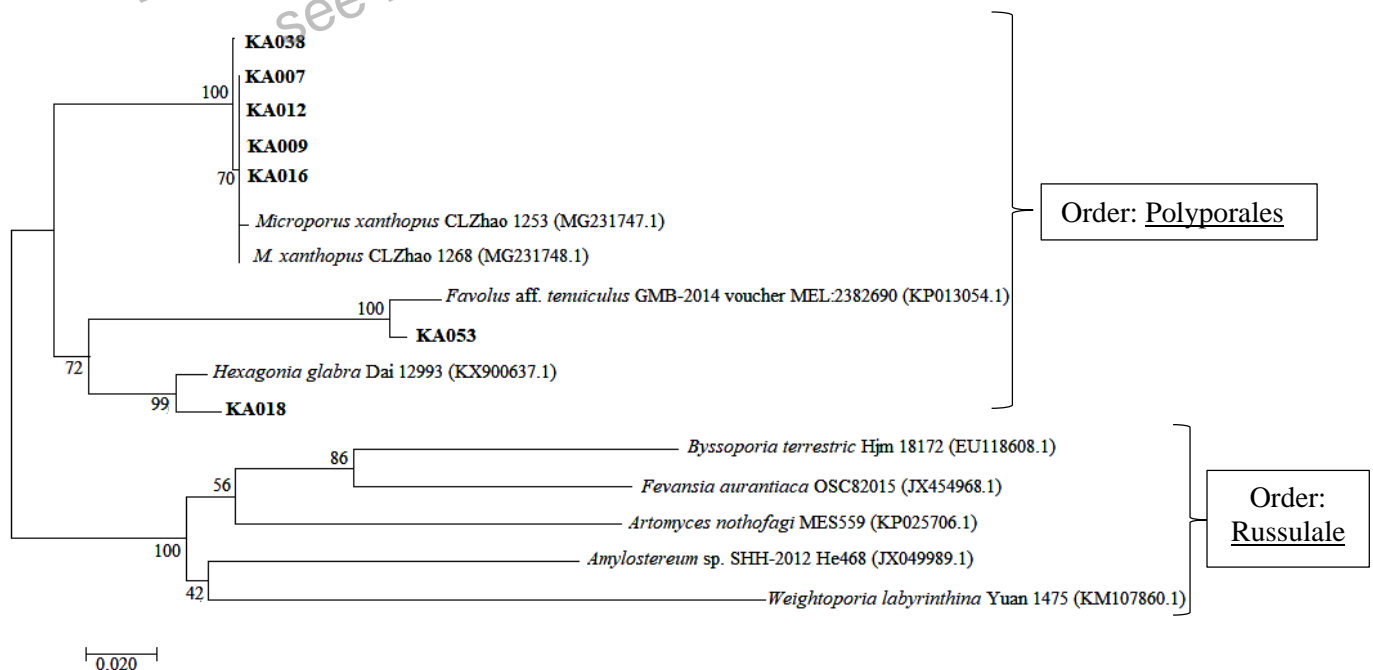

**Figure 2.** Phylogenetic tree of the polypore strains and related species based on ITS sequences obtained from GenBank generated by the maximum parsimony method. Order Russulales is the outgroup.

The raw trace files were inspected and edited with MEGA version 7 software (Kumar et al. 2016). Generated sequences were searched in BLAST (<https://blast.ncbi.nlm.nih.gov>) and then compared with available sequences in the National Center for Biotechnology Information (NCBI) GenBank nucleotide database. The evolutionary history was inferred using the Neighbor Joining (NJ)

method (Saitou and Nei, 1987). The replicate tree percentages in which the associated taxa clustered together in the bootstrap test (1000 replicates) are shown next to the branches. Sequences of accession of *Byssoporia terrestris* (EU118608.1), *Fevansia aurantiaca* (JX454968), *Artomyces nothofagi* (KP025706), *Amylostereum* sp. (JX49989.1), *Wrightoporia labyrinthine* (KM107860) from the order Russulales were included as outgroups to root the trees. The phylogenetic analyses showed that all the selected strains clustered in the order Polyporales with high support.

### Screening of cellulolytic ability

#### *First screening: Plate screening using CMC as carbon source*

The first screening of the 7 selected fungal strains was performed using the Congo red test. This test was based on the measurement of colony growth and the hydrolysis halos were used for the enzymatic index (EI) calculation. The production of the halos by cellulose hydrolysis was directly related to the region of action of cellulolytic enzymes, as the stain only remains attached to  $\beta$ -1,4-D-glucanohydrolase bonds (Lamb and Loy 2005). The results showed that the strain KA016 showed the highest degree of enzymatic index at 1.5 (Table 2).

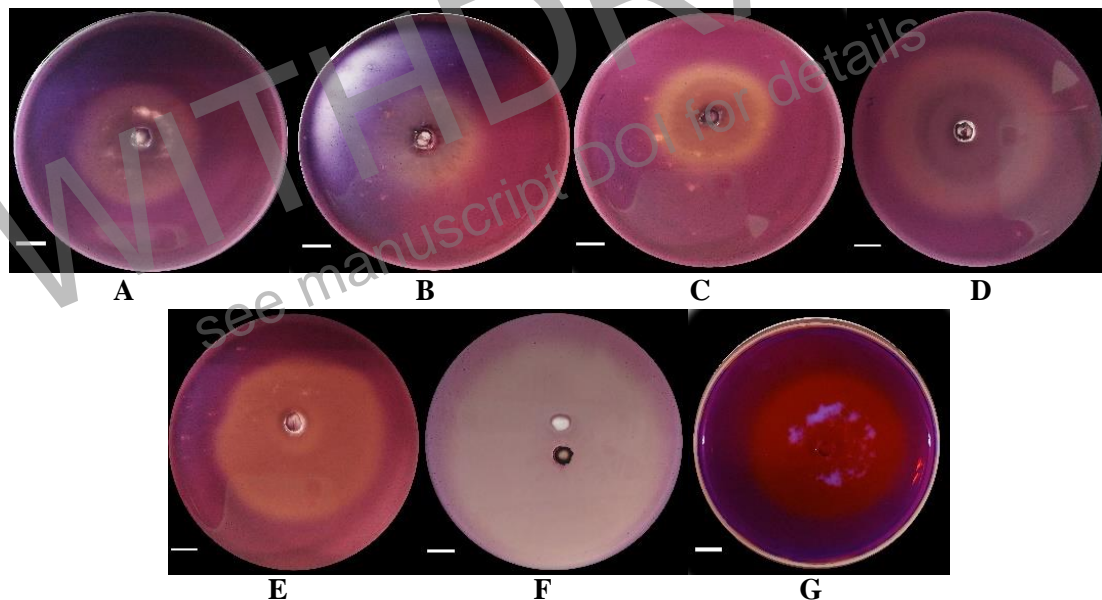

**Figure 3.** Observation of the clear zone around a colony of polypores using Congo red dye (Scale bar is 1 cm)

**Table 2.** Diameter of hydrolysis zone, diameter of colonies and enzymatic index of selected strains

| Strain                      | KA007<br>(A) | KA009<br>(B) | KA012<br>(C) | KA016<br>(D) | KA018<br>(E) | KA038<br>(F) | KA053<br>(G) |
|-----------------------------|--------------|--------------|--------------|--------------|--------------|--------------|--------------|
| Diameter of hydrolysis zone | 4.2          | 3.7          | 4.1          | 5.8          | 5.7          | 7.5          | 4            |
| Diameter of colonies        | 3.2          | 3.3          | 3            | 3.9          | 4.8          | 6.5          | 3            |
| Enzymatic index (EI)        | 1.4          | 1.12         | 1.4          | 1.5          | 1.18         | 1.15         | 1.3          |

### Secondary screening: Screening of cellulolytic ability in liquid medium

All strains were positive for cellulase and able to grow in CMC agar media (Fig. 3), but the strains differed in their ability to produce cellulose degrading enzymes (Table 1 and Fig. 4). The strain KA016 revealed the highest EI value (1.5), the strain KA053 revealed the highest cellulase activity (0.65 U/mL), whereas KA009 indicated the least clear zone diameter (EI 1.12) and the lowest cellulase activity (0.01 U/mL). As a result, only strain KA009 was not considered for further studies.

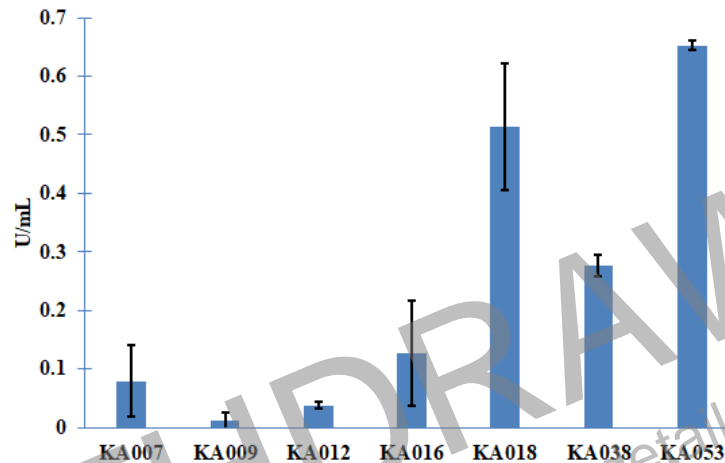

**Figure 4.** Screening and evaluation of potential cellulase activity producing polypore strains by DNS assay

### Temperature on fungal growth

The results showed that the best temperature for fungal growth was 30°C, as the growth of faster colonies was recorded at 30°C. The increase or decrease in incubation temperature did not increase the degree of growth. No growth was observed at 45°C for either strain and very poor growth was reported at 37°C for most strains. Thus, the best temperature of colony production was observed at 30°C (Fig. 4).

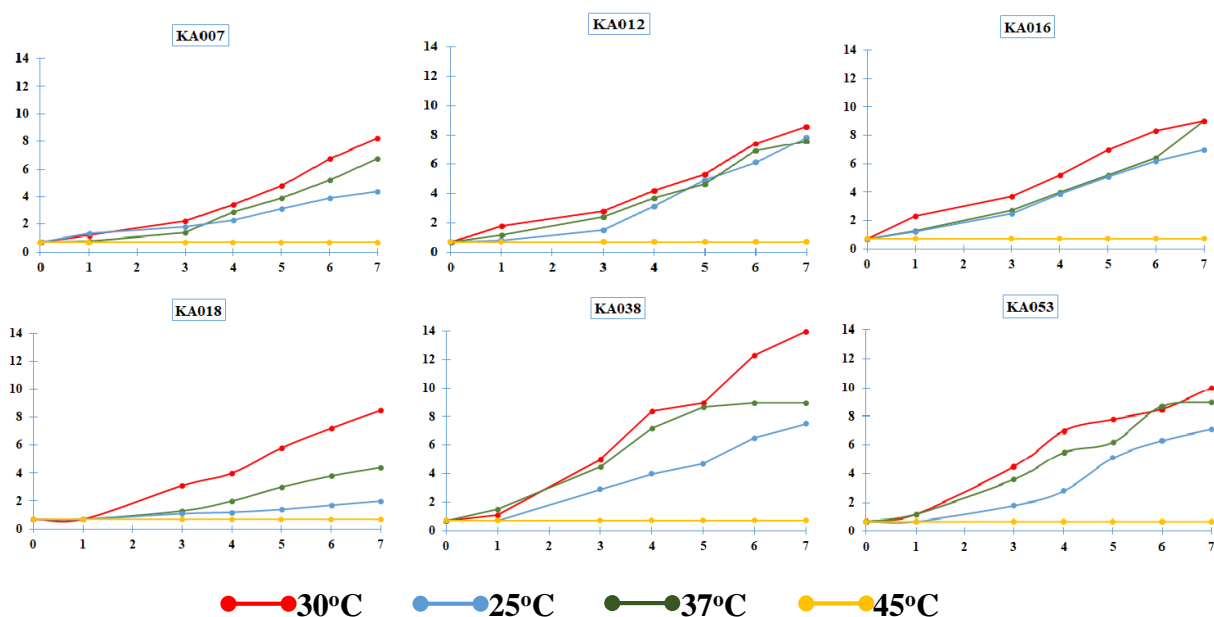

**Figure 5.** Fungal growth at various temperatures (X axis = Diameter of colonies (cm) and Y axis = Time (days))

### Upscale screening on substrate by solid state fermentation

The different degrees of potential to produce cellulase of various strains was studied by testing the activity of enzyme production by using green tea as substrate. The highest enzyme activity was observed in strain KA038 (38.62 IU/gds) (Fig. 6). Consequently, only KA038 was selected for further experiments.

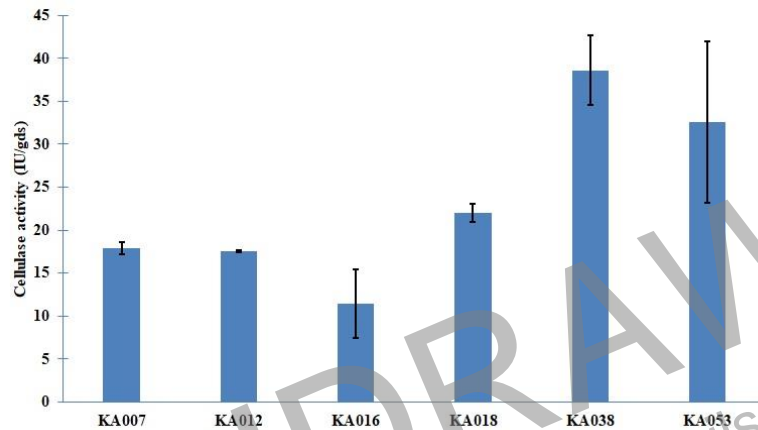

**Figure 6.** Cellulase activity by polypore on green tea waste substrates expressed as units per gram dry substrate (IU/gds)

### Molecular identification of selected strain KA038

The ITS region of rDNA sequence can be obtained and aligned with known nucleotide sequences in GenBank databases using the BLAST search option to calculate the percentage of identify. The percentages of similarity of the rDNA gene sequences between the fungal strain KA038 and the closely related white-rot fungi are shown in Table 2. The results revealed that polypore strain KA038 was closely related with *Microporus* sp. BPSM33, *Microporus xanthopus* voucher LE232511 and analysis of the ITS region sequence indicated that the selected strain KA038 could be a member of the genus *Microporus* with over 99% similarity.

**Table 3.** Percentages of similarity of the ITS gene sequences between fungal strain KA038 and closely related white-rot fungi

| Fungal strain                                | Size (bp) | Similarity (%) | Accession number |
|----------------------------------------------|-----------|----------------|------------------|
| KA038                                        | 552       | -              | This study       |
| <i>Microporus</i> sp. BPSM33                 | 491       | 100            | KM985670.1       |
| <i>Microporus</i> sp. BAB-4084               | 675       | 99.64          | KJ670303.1       |
| <i>Microporus xanthopus</i> voucher LE232511 | 584       | 99.09          | KC503506.1       |
| <i>Microporus luteus</i> voucher LE289450    | 584       | 98.55          | KC503504.1       |
| <i>Microporus luteus</i> voucher LE231601    | 584       | 98.37          | KC503505.1       |

To investigate the inter- and intra-relationships of the members in some part of the genus *Microporus*, the obtained sequences were aligned with the sequence of the type strains retrieved from the GenBank databases. A phylogenetic tree was constructed using the NJ method. The sequence of *Favolus pseudoemeric* was used as an outgroup to root the tree. As can be seen in Fig. 7, the final Neighbor-joining phylogenetic tree indicated that strain KA038 was positioned between the group of *M. xanthopus* and the undescribed species of *Microporus* genus.

The numbers at the branching points are the percentages of occurrence in 1000 bootstrapped trees. The bar indicates 1 nucleotide substitution per 100 nucleotides.



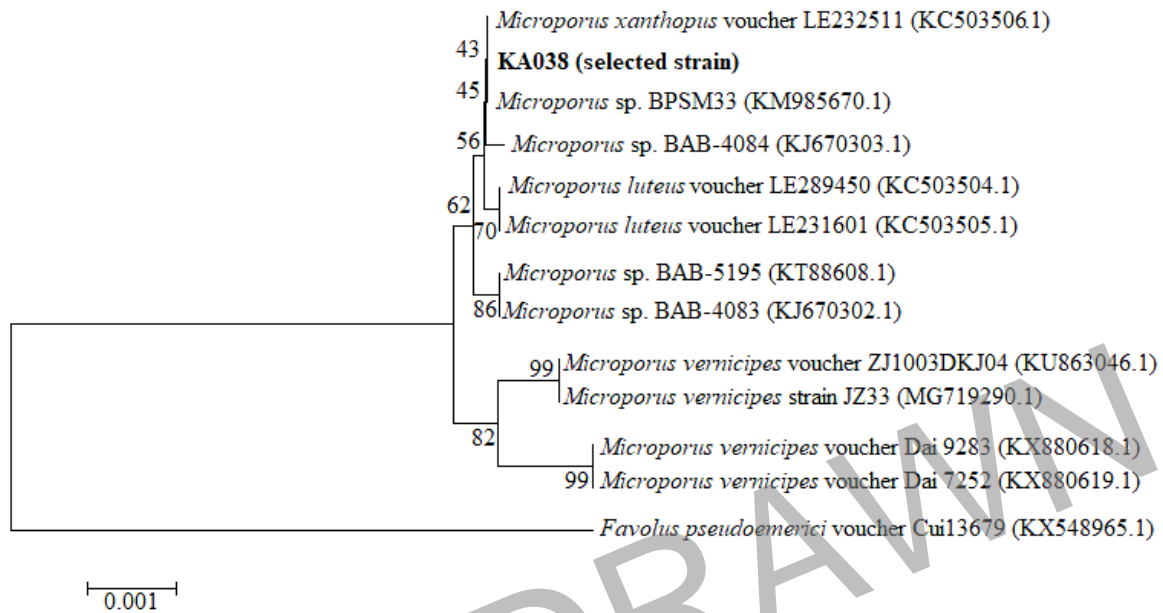

**Figure 7.** Neighbor-joining phylogenetic tree showing the position of selected strain *Microporus* sp. KA038 based on sequences of ITS region

#### Taxonomic characterization of selected strain KA038

White rot fungus strain KA038 was identified to *Microporus* sp., which belongs to the Basidiomycetes, Family Polyporaceae, Genus *Microporus*. The characterization of the strain is as follows. Basidiocarp centrally stipitate, margin undulated with narrow sterile zone below, stipe cylindrical, 0.5–1.5 cm long, pale yellow. The phenotype of the young to old fresh sample was stipitate form, with brownish-yellow to cinamon-brown color at the upside, white pores-surface at the downside, various basidiocarp sizes 2.5×3.6 to 3.5×5 cm (Fig. 8A). The fruiting-body was common on the dead trunks (Fig. 8B). The pores of the immature fruiting-body were very tiny, about 8 pores per milimetre for the mature fruiting-body (Fig. 8C).

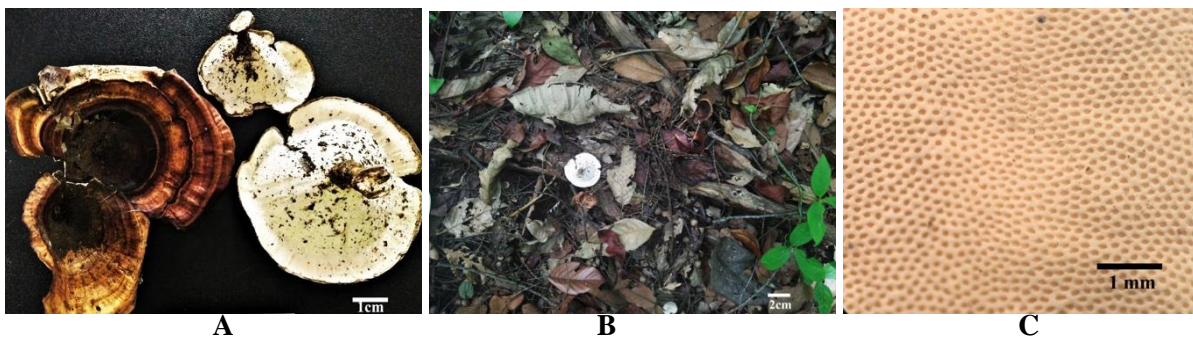

**Figure 8.** Habitat (A), mature basidiocarp (B) and the undercarp pores (C) of the selected strain

Mycelial colonies of *Microporus* sp. KA038 on PDA medium were off-white, showing high density, a velvety texture, and abundant aerial hyphae (Fig. 9A). The growth rate of *Microporus* sp. KA038 completely colonized in a Petri dish over 4 days at 30°C. The light micrograph produced under a compound microscope is shown in Fig. 9B, the fungus were generative hyphae 2–3 μm thick, colorless, binding hyphae thick-walled 1–1.5 μm (Fig 10C), and 4–5 μm wide (Fig. 10B). Cystidia absent. No clamp connection. Spores of the selected strain were elliptical in shape 5.5–7×2–2.5 μm, smooth, in-amyloid and sparse (Fig. 10A).

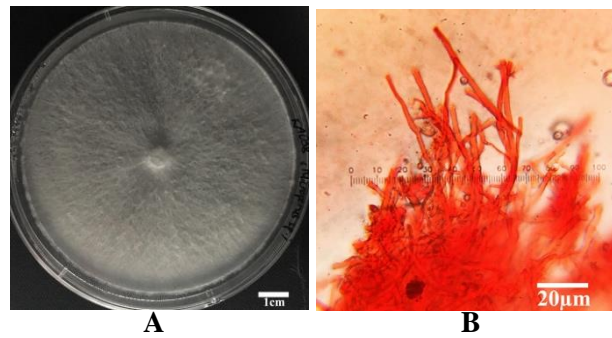

**Figure 9.** *Microporus* sp. KA038, colony morphology (A) and light micrograph without clamp connection (B) grown on PDA for 7 days at 30°C

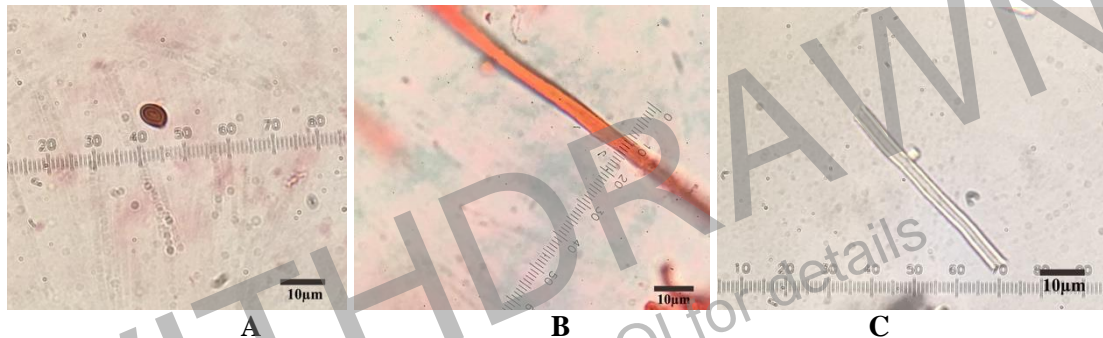

**Figure 10.** Spores (A), hyphae (B) and the thick-walled wall of hyphae (C) of selected strain *Microporus* sp. KA038

#### Effect of moisture content on cellulase production

Moisture is a very essential factor in the SSF process. Consequently, this adjustment has a significant influence on growth, microbe biosynthesis and secretion of metabolites such as enzymes. For the strain *Microporus* sp. KA038, the optimal moisture content was 75% (control) and activity was recorded at 38.62 IU/gds (Fig.11). It was reported that the production of enzymes was negatively affected in the instances of increased or decreased moisture. Ahmed (2008) and Sodhi et al. (2005) claimed that the crucial factor influencing the outcome of SSF is the moisture content of the substrate, and that the reduction of nutrients provided to the organisms resulted in lower moisture content. On the other hand, high moisture caused a reduction in enzyme production that may have been due to the substrate porosity reduction, the structure of substrate particles change, the gas volume decrease and microbial growth reduction (Baysal et al. 2003). This result was achieved in upscale screening on the substrate by solid state fermentation, and a better result was observed than with other moisture contents. The optimal moisture of 75% was used for further experiments.

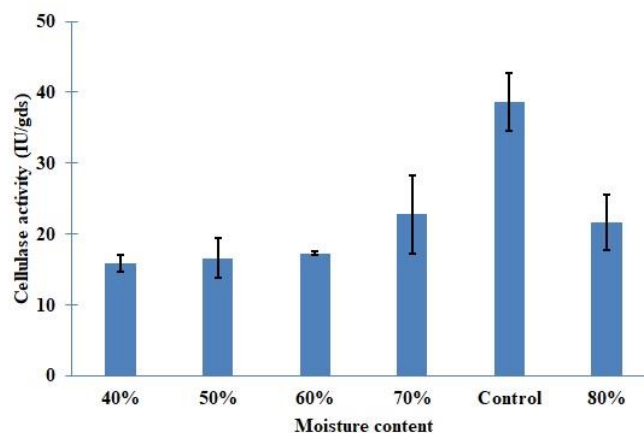

**Figure 11.** Effect of moisture content on cellulase production by polypore fungi

### Effect of nitrogen source on cellulase production

Nitrogen source is important for industrial fermentation medium that is designed to meet maximum enzyme production. The result of the effect of various nitrogen sources on cellulase production is illustrated in Figure 12. Among the different nitrogen sources, the highest degrees of cellulase production were 43.5 IU/gds and 46 IU/gds, when beef extract was added as an organic nitrogen source and  $\text{NH}_4\text{H}_2\text{PO}_4$  was added as a source of inorganic nitrogen, respectively.

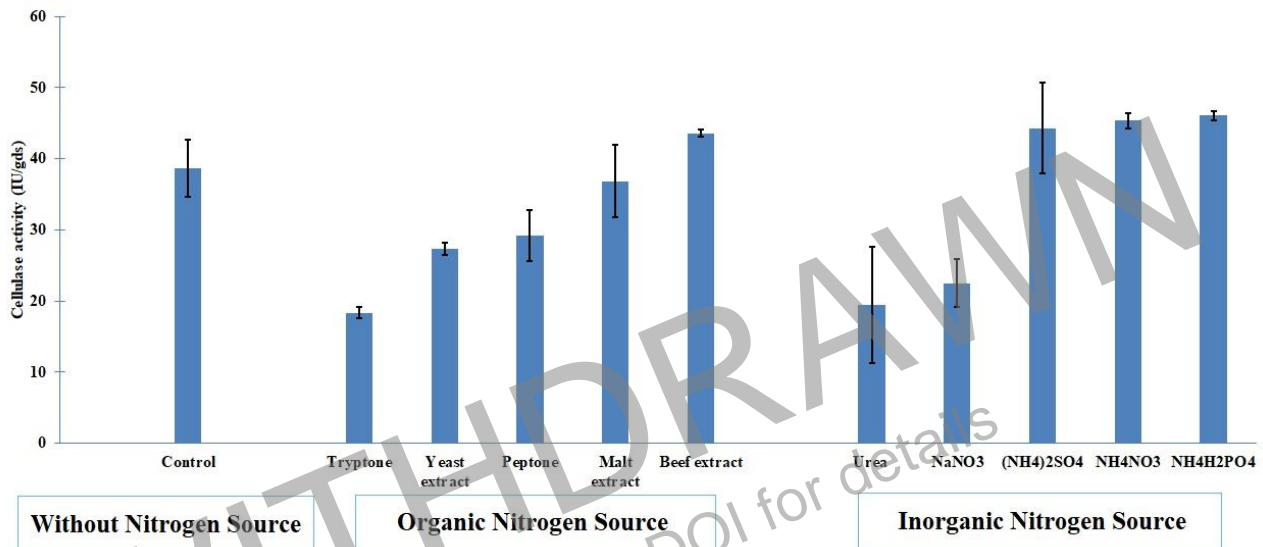

Figure 12. Optimization of nitrogen source for cellulase production

### Effect of pH value on cellulase production

As is shown in Figure 13, the effect of pH on cellulase production was determined at pH values ranging from 4.0 to 12.0. Green tea waste revealed a maximum cellulase activity of 49.9 IU/gds at pH 7.0. The enzyme was still active over a wide pH range and it was observed that the cellulase activity had a broad pH range of between 4.0 and 12.0. This was due to the fact that cultivation of fungi at an unfavorable pH value may result in reduced enzyme activity by reducing accessibility of the substrate (Bakri et al. 2008). In the SSF process, for optimizing the initial pH, precautionary measures were taken as a result of the fact that only at a particular pH, extracellular enzymes were stable and there may be rapid denaturation at lower or higher values. Notably, the metabolic activities of the microorganism are very sensitive to changes in pH because pH affects the cellulase production of fungi (Kalra and Sandhu, 1986).

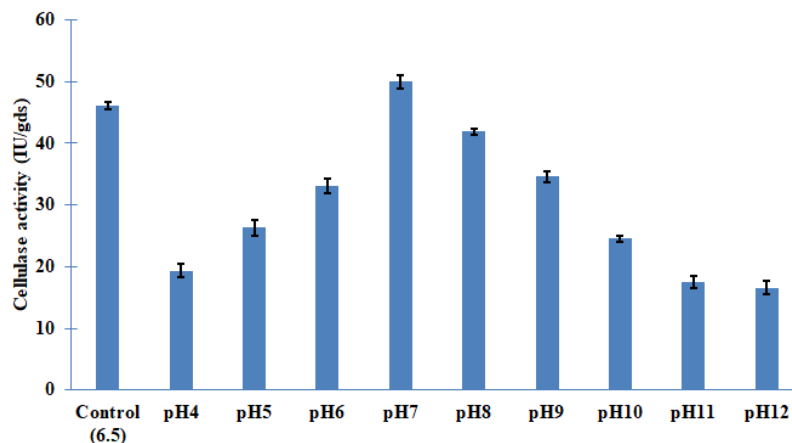

Figure 13. Optimization of pH for cellulase production

### Effect of inoculum size on cellulase production

Maximum activity was noted with 10 discs of inoculum size of the inoculated strain (Fig. 14). By increasing the inoculum size, an increase in enzyme activity was recorded. The maximum cellulase activity recorded was 51.27 IU/gds with 10 discs of inoculum (Figure 14).

Notably, there is an indispensable factor influencing the optimal inoculum size in SSF because smaller inoculations can be short of biomass and allow the unexpected organism growth, whereas a high inoculation may tend to be full of biomass and deplete the necessary nutrients (Pandey et al. 2003). Irrespective of SSF or SmF, inoculum size can greatly influence the yield of the final product (Prakasham et al. 2006).

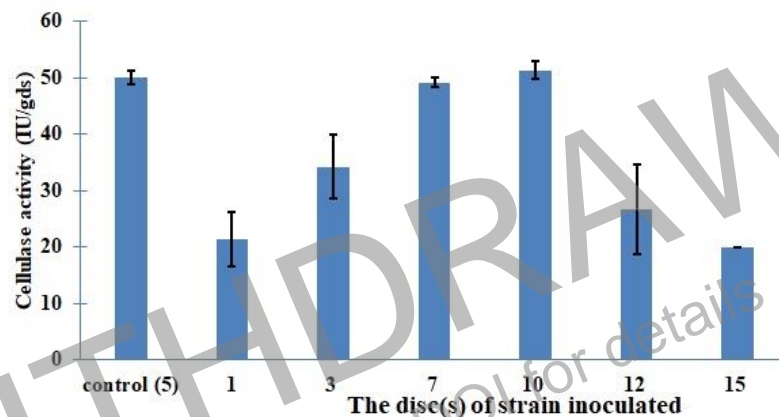

Figure 14. Optimization of inoculum size for cellulase production

### Effect of incubation time on cellulase production

The time of fermentation has an important impact on product formation. Enzyme production is related to the time of incubation (Gautam et al. 2011). Time course for the production of cellulase enzyme was investigated and fermentation for a period of 4 to 24 days was carried out. The results revealed that the maximum cellulase activity (81.8 IU/gds) was observed at an incubation time of 4 days for *Microporus* sp. The enzyme activity gradually increased with a decrease in incubation time up to the optimum level, followed by a gradual fall in activity (Fig. 15). This trend of decreased enzyme activity may have been due to the depletion of macro and micronutrients in the fermentation medium with a lapse in time, which stressed the fungal physiology resulting in the inactivation of the secretory machinery of the enzyme (Rajendran et al. 2015).

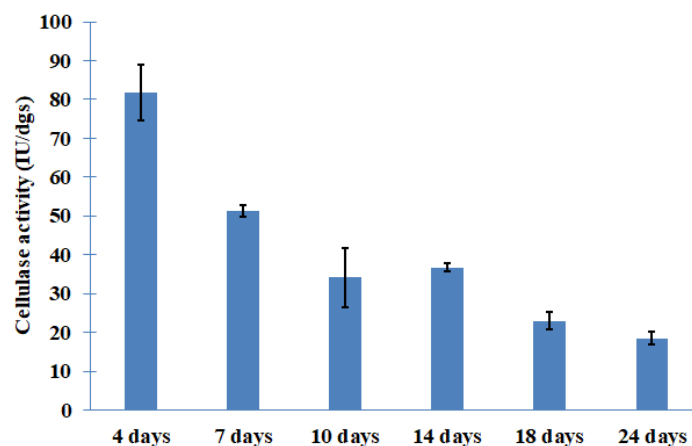

Figure 15. Optimization of incubation time for cellulase production

## Conclusions

The potential of utilizing green tea waste as a substrate for cellulase production under SSF by isolated polypore fungi was identified and studied. Under optimum SSF conditions of 5 grams of substrate for *Microporus* sp. strain KA038, 30°C of incubation; moisture content, nitrogen source and optimum pH were found to be 75%, beef extract and  $\text{NH}_4\text{H}_2\text{PO}_4$ , pH 7.0. The cellulase activity increased gradually from 1 to 10 disc(s) of inoculum and then fell at 12 discs of inoculum onward. The shortest incubation time of 4 days produced the best cellulase activity that increased from 51.27 IU/gds to 81.8 IU/gds. In this study, cellulase activity increased by 1.6 fold after one factor at-a-time optimization procedure was employed using *Microporus* sp. strain KA038.

## Acknowledgements

The authors gratefully acknowledge the financial support provided from the Center of Excellence on Biodiversity (BDC), the Office of Higher Education Commission (BDC-PG2-159013), TRF Research-Team Association Grant (RTA5880006) and the Graduate School of Chiang Mai University for the trainee scholarship.

## References

- Acharya BK, Mohana S, Jog R, Divecha J, Madamwar D (2010). Utilization of anaerobically treated distillery spent wash for production of cellulases under solid-state fermentation. *Journal of Environmental Management* 91(10), 2019–2027.
- Afzal A, Kamran M, Mehmood S, Irshad M (2014). Induced production of exoglucanase, and  $\beta$ -glucosidase from fungal co-culture of *T. viride* and *G. lucidum*. *Advances in Bioscience and Biotechnology* 5(5), 426–433.
- Ahmed SA (2008). Optimization of Production and Extraction Parameters of *Bacillus megaterium* *Levansucrase* using solid state fermentation. *Journal of Applied Sciences Research* 4(10), 1199–1204.
- Bakri Y, Jawahar M, Arabi MIE (2008). Improvement of xylanase production by *Cochliobus sativus* in submerged culture. *Food Technology and Biotechnology* 46(1), 116–118.
- Baysal Z, Uyar F, Aytekin C (2003). Solid state fermentation for production of  $\alpha$ -amylase by a thermotolerant *Bacillus subtilis* from hot spring water. *Process Biochemistry* 38(12), 1665–1668.
- Beguin P and Aubert JP (1994). The biological degradation of cellulose. *FEMS Microbiology Reviews* 13(1), 25–58.
- Bisht M, Rathi N, Rai JPN (2017). Importance of lignin modifying enzymes from isolated white rot fungus in lignin degradation. *International Journal of Innovative Research in Science, Engineering and Technology* 6(7), 2347–6710.
- Chinedu SN, Okochi V, Smith H, Omidiji O (2005). Isolation of cellulolytic micro-fungi involved in wood-waste decomposition: Prospects for enzymatic hydrolysis of cellulosic wastes. *International Journal of Biomedical and Health Sciences* 1(2), 0794–4748.
- Chuwech M, Nuansri R (2015). Potential of peanut hulls as substrates for fungal cellulase bioproduction through solid state fermentation. *KKU Research Journal* 19(2014), 235–243.
- Chuwech M, Rakariyatham N, Chandet N, Tinoi J (2016). Utilization of pretreated corn cobs for cellulase production by *Pycnoporus coccineus*. *KKU Research Journal* 21(2), 310–318.
- Delabona PDS, Lima D, Robl D, Rabelo S, Farinas C, Pradella CJ (2016). Enhanced cellulase production by *Trichoderma harzianum* by cultivation on glycerol followed by induction on cellulosic substrates. *Journal of Industrial Microbiology & Biotechnology* 43(5), 617–626.

- Gautam SP, Bundela PS, Pandey AK, Jamaluddin K, Awasthi MK, and Sarsaiya S (2011). Optimization for the production of cellulase enzyme from municipal solid waste residue by two novel cellulolytic fungi. *Biotechnology Research International* 2011(2011), 1–8.
- Ginns J (2017.) *Polypores of British Columbia (Fungi: Basidiomycota)*. Technical Report 104, 1–256.
- Govumoni SP, Gentela J, Koti S, Haragopal V, Venkateshwar S, Rao LV (2015). Extracellular lignocellulolytic enzymes by *Phanerochaete chrysosporium* (MTCC 787) under solid-state fermentation of agro wastes. *International Journal of Current Microbiology and Applied Sciences* 4(10), 700–710.
- Han X, Liu G, Song W, Qin Y, Qu Y (2017). Continuous feeding of spent ammonium sulphite liquor improves the production and saccharification performance of cellulase by *Penicillium oxalicum*. *Bioresource Technology* 245(2017), 984–992.
- Henrissat B (1991). A classification of glycosyl hydrolases based on amino acid sequence similarities. *Biochemical Journal* 280(2), 309–316.
- Isikgora Furkan H. and Becer C. Remzi (2015). Lignocellulosic biomass: a sustainable platform for the production of bio-based chemicals and polymers. *Polymer Chemistry* 2015(6), 4497–4559.
- Jaana K, Miia MR, Jarkko I, Ilona O, Taina L (2015). Lignocellulose-converting enzyme activity profiles correlate with molecular systematics and phylogeny grouping in the incoherent genus *Phlebia* (Polyporales, Basidiomycota). *BMC Microbiology* 15(217), 1–18.
- Jayachandran M, Xiao J, Xu B. (2017). A critical review on health promoting benefits of edible mushrooms through gut microbiota. *International Journal of Molecular Sciences* 18(1934), 1–12.
- Kalra MK, Sandhu DK (1986). Optimal production of cellulolytic enzymes and their location in *Trichoderma pseudokonigii*. *Biotechnologia Acta* 6(2), 161–166.
- Kondo M, Kita K and Yokota HO (2004). Feeding value to goats of whole-crop oat ensiled with green tea waste. *Animal Feed Science and Technology* 113(1–4), 71–81.
- Kumar S, Stecher G, Tamura K (2016). MEGA7: Molecular evolutionary genetics analysis version 7.0 for bigger datasets. *Molecular Biology and Evolution* 33(7), 1870–1874.
- Lamb J and Loy T (2005). Seeing red: the use of Congo Red dye to identify cooked and damaged starch grains in archaeological residues. *Journal of Archaeological Science* 32(10), 1433–1440.
- Metrevelia E, Kachlishvilia E, Singer SW, Elisashvili V (2017). Alteration of white-rot basidiomycetes cellulase and xylanase activities in the submerged co-cultivation and optimization of enzyme production by *Irpex lacteus* and *Schizophyllum commune*. *Bioresource Technology* 241(2017), 652–660.
- Miller GL (1959). Use of dinitrosalicylic acid reagent for determination of reducing sugar. *Analytical Chemistry* 31(3), 426–428.
- Montoya S, Sanchez OJ, Levin L (2015). Production of lignocellulolytic enzymes from three white-rot fungi by solid state fermentation and mathematical modeling. *African Journal of Biotechnology* 14(15), 1304–1317.
- Oliveira SLR, Maciel TC, Sancho SO, Rodrigues S (2016). Solid-state production of cellulase by *Melanoporia* sp. CCT 7736: a new strain isolated from coconut shell (*Cocos nucifera* L.). *Bioresource Bioprocess* 3(9), 1–11.
- Onofre SB, Santos ZM, Kagimura FY, Mattoello SP (2015). Cellulases produced by the endophytic fungus *Pycnoporus sanguineus* (L.) Murill. *African Journal of Agricultural Research* 10(13), 1557–1564.

- Pandey A, Bogar B, Tengerdy RP (2003). Optimization of cellulase production by solid substrate fermentation. *Journal of Industrial Microbiology & Biotechnology* 30, 183–189.
- Prakasham RS, Subba C, Sharma PN (2006). Green gram husk - an inexpensive substrate for alkaline protease production by *Bacillus* sp. in solid state fermentation. *Bioresource Technology* 97(13), 1449–1454.
- Rajeev Ravindran, Amit K. Jaiswal (2016). Microbial enzyme production using lignocellulosic food industry wastes as feedstock: a review. *Bioengineering* 3(30), 1–22.
- Rajendran R, Radhai R, Karthik SS, and Rajalakshmi V (2015). Utilization of cellulosic biomass as a substrate for the production of bioethanol. *International Journal of Environmental Sciences* 5(4), 743–753.
- Rana S, Kaur M (2012). Isolation and screening of cellulase producing microorganisms from degraded wood. *International Journal of Pharmaceutical and Biological Sciences Fundamentals*, 2(1), 10–15.
- Saha BC, Kennedy GJ, Qureshi N, Cotta MA (2017). Biological pretreatment of corn stover with *Phlebia brevispora* NRRL-13108 for enhanced enzymatic hydrolysis and efficient ethanol production. *Biotechnology Progress* 33(2), 365–374.
- Saitou N, Nei M (1987). The neighbor-joining method: a new method for reconstructing phylogenetic trees. *Molecular Biology and Evolution* 4(4), 406–425.
- Sherief AA, El-Naggar NE, Hamza SS (2010). Bioprocessing of lignocellulosic biomass for production of bioethanol using thermotolerant *Aspergillus fumigatus* under solid state fermentation conditions. *Biotechnology* 9(4), 513–522.
- Sodhi, H.K., Sharma, K., Gupta, J.K., Soni, S.K (2005). Production of a thermostable  $\alpha$ -amylase from *Bacillus* sp. PS-7 by solid state and its synergistic use in the hydrolysis of malt starch for alcohol production. *Process Biochemistry* 40(2), 525–534.
- Sukumaran RK, Singhania RR, Pandey A (2005). Microbial cellulases-production, applications and challenges. *Journal of Scientific & Industrial Research* 64(11), 832–844.
- Vasava AM, Patel RS, Koyani RD, Rajput KS (2018). Distribution and diversity of Polyporaceae in Western India: An overview and addition to mycoflora of the Gujarat state. *Plant Science Today* 5(1), 32–38.
- Vintila T, Dragomirescu M, Strava S, Croitoriu V (2009). Enzymatic hydrolysis of agricultural lignocellulosic biomass. *Zootehnie Şi Biotehnologii* 42(1), 1–5.
- White TJ, Bruns T, Lee S, Taylor J (1990). Amplification and direct sequencing of fungal ribosomal RNA genes for phylogenetics. *PCR Protocols: A Guide to Methods and Applications* (Innis MA, Gelfand DH, Sninsky JJ & White TJ, eds). Academic Press 315–322.
- Yang D, Liang J, Wang Y, Sun F, Tao H, Xu Q, Zhang L, Zhang Z, Ho C, Wan X (2015). Tea waste: an effective and economic substrate for oyster mushroom cultivation. *Journal of the Science of Food and Agriculture* 2016(96), 680–684.
- Zecarias G, Duangporn P, Siripong P (2016). Screening of fungi producing ligninolytic enzymes by plate test technique. *KKU Research Journal* 22(1), 200–209.
- Zhang YHP, Lynd LRA (2006). Functionally based model for hydrolysis of cellulose by fungal cellulase. *Biotechnology and Bioengineering* 94(5), 888–898.
